# Supplementary material for: Carbon microarrays for the direct impedimetric detection of Bacillus anthracis using Gamma phages as probes
Source: Royal Society of Chemistry journal article supplement (doi:10.1039/c3an36830k), 2013-01-01
Supplement: c3an36830k.pdf [file c3an36830k.pdf]

**Supplementary Materials**

**TABLE 2** Typical values extracted from the Nyquist plots at intermediate concentrations.

| <b><i>B. anthracis</i> concentration<br/>(cfu/mL)</b> | <b><math>\Delta Z_r</math> (Ohms)</b> | <b><math>2\sigma^2 Cd</math> (Ohms)</b> |
|-------------------------------------------------------|---------------------------------------|-----------------------------------------|
| <b>0</b>                                              | <b>0</b>                              | <b><math>24.10 \times 10^3</math></b>   |
| <b><math>10^2</math></b>                              | <b><math>7.40 \times 10^2</math></b>  | <b><math>23.36 \times 10^3</math></b>   |
| <b><math>10^3</math></b>                              | <b><math>8.73 \times 10^2</math></b>  | <b><math>23.23 \times 10^3</math></b>   |
| <b><math>10^4</math></b>                              | <b><math>16.17 \times 10^2</math></b> | <b><math>22.48 \times 10^3</math></b>   |
| <b><math>10^5</math></b>                              | <b><math>26.80 \times 10^2</math></b> | <b><math>21.42 \times 10^3</math></b>   |
| <b><math>10^6</math></b>                              | <b><math>38.32 \times 10^2</math></b> | <b><math>20.27 \times 10^3</math></b>   |
| <b><math>10^7</math></b>                              | <b><math>42.26 \times 10^2</math></b> | <b><math>19.87 \times 10^3</math></b>   |
| <b><math>10^8</math></b>                              | <b><math>52.67 \times 10^2</math></b> | <b><math>18.83 \times 10^3</math></b>   |
